# Supplementary material
Source: PubMed Central journal article supplement (PMC5063753)
Supplement: CCRep-9-2016-091-s001.pdf [file CCRep-9-2016-091-s001.pdf]

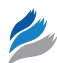**Supplementary Table 1.** Recent cases that describe amiodarone pulmonary toxicity in order of date of publication.

| YEAR OF PUBLICATION | TITLE                                                                                                            | AUTHORS                                                         |
|---------------------|------------------------------------------------------------------------------------------------------------------|-----------------------------------------------------------------|
| 2016                | Amiodarone Pulmonary Toxicity: A Case Report and Review of the Literature. <sup>1</sup>                          | Shamim Z, Sarkar PR.                                            |
| 2015                | Acute Amiodarone Pulmonary Toxicity after Drug Holiday: A Case Report and Review of the Literature. <sup>2</sup> | Abuzaid A, Saad M, Ayan M, et al.                               |
| 2014                | Amiodarone-Induced Pulmonary Toxicity Mimicking Metastatic Lung Disease: Case Report. <sup>3</sup>               | Milenkovic B.                                                   |
| 2012                | Severe amiodarone induced pulmonary toxicity. <sup>4</sup>                                                       | Nacca N, Bhamidipati CM, Yuhico LS, Pinnamaneni S, Szombathy T. |
| 2010                | Amiodarone-induced alveolar haemorrhage: a rare complication of a common medication. <sup>5</sup>                | Tanawuttiwat T, Harindhanavudhi T, Hanif S, Sahloul MZ.         |
| 2009                | Amiodarone Pulmonary Toxicity. <sup>6</sup>                                                                      | Wolkove N, Baltzan M.                                           |

Works Cited: Recent Case Reports on Amiodarone Pulmonary Toxicity

<sup>1</sup>Shamim Z, Sarkar PR. Amiodarone Pulmonary Toxicity: A Case Report and Review of the Literature. *Journal of Pulmonary & Respiratory Medicine J Pulm Respir Med.* 2016;6(3). doi:10.4172/2161-105x.1000343.

<sup>2</sup>Abuzaid A, Saad M, Ayan M, et al. Acute Amiodarone Pulmonary Toxicity after Drug Holiday: A Case Report and Review of the Literature. *Case Reports in Cardiology.* 2015;2015:1–3. doi:10.1155/2015/927438.

<sup>3</sup>Milenkovic B. Amiodarone-Induced Pulmonary Toxicity Mimicking Metastatic Lung Disease: Case Report. *Journal of Pharmacovigilance J Pharmacovigil.* 2014;02(04). doi:10.4172/2329-6887.1000137.

<sup>4</sup>Nacca N, Bhamidipati CM, Yuhico LS, Pinnamaneni S, Szombathy T. Severe amiodarone induced pulmonary toxicity. *Journal of Thoracic Disease.* 2012;4(6): 667–670. doi:10.3978/j.issn.2072-1439.2012.06.08.

<sup>5</sup>Tanawuttiwat T, Harindhanavudhi T, Hanif S, Sahloul MZ. Amiodarone-induced alveolar haemorrhage: a rare complication of a common medication. *Heart Lung Circ.* 2010 Jul;19(7):435-7. doi: 10.1016/j.hlc.2010.01.008. Epub 2010 Mar 30. PubMed PMID: 20356785.

<sup>6</sup>Wolkove N, Baltzan M. Amiodarone Pulmonary Toxicity. *Canadian Respiratory Journal.* 2009;16(2):43–48. doi:10.1155/2009/282540.
